# Supplementary material for: Ethnobotanical survey, phytoconstituents and antibacterial investigation of Rapanea melanophloeos (L.) Mez. bark, fruit and leaf extracts
Source: publisher site journal article supplement (doi:10.1515/psr-2020-0143), 2021-05-20
Supplement: Supplementary file 1 [file j_psr-2020-0143_suppl.docx]

**Supplementary material**

Tab. 2a: Relative abundancies of major compounds in *R. melanophloeos* PE extracts of the leaves, bark and fruits as observed from GC-MS analysis.

| **Plant part** | **Sample** | **Compound (retention time )** | | | | |
| --- | --- | --- | --- | --- | --- | --- |
| **a** | **b** | **c** | **d** | **e** |
| **Leaves** | A1 | tr | tr | – | – | x |
| A2 | tr | tr | tr | – | x |
| B2 | x | x | x | tr | x |
| B3 | tr | tr | tr | tr | x |
| B4 | tr | x | tr | tr | – |
| C1 | xx | xxx | xx | x | x |
| C3 | xx | xxx | xxx | xx | x |
| C4 | xx | xxx | xxx | xx | x |
| D1 | x | xxx | xx | x | x |
| D3 | x | xxx | xx | x | x |
| D5 | x | xxx | xx | x | x |
| E1 | xx | xxx | xxx | xx | x |
| F1 | xx | xxx | xx | x | – |
| F2 | xx | xxx | xxx | xx | – |
| F3 | xx | xxx | xxx | xx | x |
| **Bark** | A1 | – | tr | – | – | – |
| B2 | – | – | – | – | – |
| C1 | – | – | – | – | – |
| D3 | tr | tr | tr | tr | tr |
| E1 | – | tr | – | – | x |
| F2 | tr | xx | xx | x | xx |
| **Fruits** | A1 | tr | xxx | xx | xx | tr |
| B2 | x | xxx | xx | xx | x |
| B3 | tr | xxx | xx | x | xx |
| D1 | x | xxx | xx | xx | x |

**Key**: – = not detected; tr – trace (counts < 5 x 105); x – present in low quantities (counts between 6-25 x 105); xx – present in moderate quantities (counts between 26-100 x 105); xxx – presentin high quantities (counts > 100 x 105)
